# Supplementary material for: Limited effect of a highway barrier on the genetic structure of a gypsum soil specialist
Source: PeerJ. 2021 Jan 4;9:e10533. doi: 10.7717/peerj.10533 (PMC7789860; doi:10.7717/peerj.10533)
Supplement: Supplemental Information 1 — Presence of null alleles, Hardy-Weinberg equilibrium, average values of allelic richness, private alleles’ number, expected heterozygosity (HE), observed heterozygosity (HO), inbreeding coefficient (F), genetic differentiation (FST) and migratory individuals’ number (Nm). The highway side informs about the populations’ situation respect to the highway. [file peerj-09-10533-s001.xlsx]

## Sheet: Hoja1
Population	Individuals	Highway side	Locus with null alleles	H-W equilibrium	Allelic Richness	Rarefied Allelic Richness	Private Alleles	He	Ho	F	FST	Nm
1	17	SO	Lepi3	1.57e-05	7.4±1.2	4.4±0.5	0	0.8±0.0	0.7±0.1	0.1±0.2	0.1±0.0	4.9±2.1
2	15	SO	Lepi2	0.020366	7.1±1.2	4.2±0.7	1	0.7±0.1	0.7±0.2	0.0±0.2	0.1±0.0	3.0±1.2
3	20	SO	None	4.2*10-8	7.4±3.3	8.2±0.6	2	0.7±0.3	0.5±0.3	0.2±0.2	0.1±0.0	1.6±0.5
4	8	SO	Lepi2, Lepi3, Lepi4	0.003228	4.6±1.2	3.8±0.9	5	0.7±0.1	0.6±0.2	0.1±0.5	0.1±0.0	2.6±0.9
5	20	SO	Lepi3	0.026735	8.8±1.7	4.6±1.0	2	0.8±0.2	0.8±0.2	0.0±0.2	0.1±0.0	3.3±1.6
6	16	SO	Lepi2, Lepi4	< 5.46*10-6	7.8±2.8	4.3±1.0	2	0.7±0.1	0.6±0.1	0.1±0.2	0.1±0.0	4.1±1.7
7	20	SO	Lepi2, Lepi3, Lepi4, Lepi8	< 1.41*10-6	8.0±2.7	4.5±0.8	1	0.8±0.1	0.63±02	0.2±0.3	0.1±0.0	5.3±3.2
8	14	SO	Lepi4	< 2.83*10-7	6.5±2.4	4.1±1.3	0	0.7±0.3	0.6±0.2	0.1±0.2	0.1±0.0	3.0±1.5
9	19	SO	Lepi2, Lepi3, Lepi7, Lepi12	0.000152	9.3±2.8	4.7±1.3	3	0.7±0.2	0.6±0.2	0.2±0.1	0.1±0.0	3.1±1.6
10	18	SO	Lepi2, Lepi3, Lepi4, Lepi7, Lepi8	< 5.61*10-12	9.5±3.2	5.3±0.8	4	0.8±0.1	0.6±0.1	0.3±0.1	0.1±0.0	3.7±1.5
11	20	SO	Lepi2, Lepi4, Lepi12	< 1.04*10-10	8.6±1.6	4.6±0.7	2	0.8±0.1	0.6±0.1	0.2±0.2	0.1±0.0	5.2±2.9
12	11	SO	None	2.59e-05	5.6±2.5	8.3±0.6	0	0.7±0.3	0.5±0.3	0.3±0.3	0.1±0.0	1.4±0.4
13	7	NE	None	0.509432	6.4±1.7	4.8±0.9	3	0.8±0.1	0.8±0.2	0.0±0.2	0.1±0.0	4.4±2.3
14	9	NE	None	0.106136	7.0±2.0	4.7±1.2	1	0.7±0.1	0.7±0.1	0.0±0.2	0.1±0.0	3.6±1.6
15	20	NE	Lepi2, Lepi3, Lepi4	< 2.78*10-10	8.4±1.9	4.7±1.0	0	0.±0.1	0.6±0.2	0.2±0.2	0.1±0.1	4.8±2.5
16	14	NE	Lepi2, Lepi8, Lepi12	< 1.47*10-8	8.5±1.8	4.8±0.9	0	0.8±0.1	0.7±0.2	0.1±0.2	0.1±0.2	4.9±2.3
17	18	NE	Lepi3, Lepi4	< 3.97*10-7	8.3±1.8	4.6±0.8	0	0.8±0.1	0.7±0.1	0.1±0.2	0.1±0.3	4.7±2.5
18	17	NE	None	< 2.85*10-7	7.8±2.4	4.6±0.6	0	0.8±0.1	0.6±0.1	0.2±0.1	0.1±0.0	3.8±1.6
19	11	NE	Lepi2, Lepi3, Lepi4	< 3.49*10-7	7.3±1.6	4.8±0.8	0	0.8±0.1	0.6±0.2	0.2±0.3	0.1±0.0	4.7±2.9
20	18	NE	Lepi2, Lepi3, Lepi4, Lepi8	< 1.95*10-6	8.3±2.5	4.6±0.7	0	0.8±0.1	0.7±0.2	0.2±0.2	0.1±0.0	5.4±3.0
21	19	NE	Lepi4, Lepi5	< 6.87*10-12	10.4±1.8	5.2±0.6	2	0.8±0.0	0.7±0.0	0.2±0.1	0.1±0.0	5.4±2.4
22	20	NE	Lepi2, Lepi5	0.006958	9.3±2.6	4.9±0.8	1	0.8±0.1	0.8±0.1	0.1±0.2	0.1±0.0	5.6±2.9
23	20	NE	Lepi4, lepi12	< 4.29*10-6	8.0±2.4	4.4±0.6	2	0.8±0.0	0.7±0.2	0.1±0.3	0.1±0.0	4.5±2.1
24	17	NE	Lepi2, Lepi7, Lepi8, Lepi12	2.22*10-9	8.0±2.0	5.0±0.7	4	0.8±0.1	0.6±0.1	0.3±0.1	0.1±0.0	3.0±1.2
