# Supplementary material for: Limited effect of a highway barrier on the genetic structure of a gypsum soil specialist
Source: PeerJ. 2021 Jan 4;9:e10533. doi: 10.7717/peerj.10533 (PMC7789860; doi:10.7717/peerj.10533)
Supplement: Supplemental Information 2 [file peerj-09-10533-s002.xlsx]

## Sheet: Hoja1
Population	Pop1	Pop2	Pop3	Pop4	Pop5	Pop6	Pop7	Pop8	Pop9	Pop10	Pop11	Pop12	Pop13	Pop14	Pop15	Pop16	Pop17	Pop18	Pop19	Pop20	Pop21	Pop22	Pop23	Pop24
Pop1	NA	0.082024	0.097706	0.068724	0.104744	0.041328	0.03614	0.077482	0.111497	0.054349	0.033689	0.099627	0.027895	0.050385	0.048417	0.031262	0.037945	0.069235	0.018898	0.02684	0.027481	0.034742	0.047019	0.084077
Pop2	0.082024	NA	0.144715	0.175272	0.143998	0.085514	0.101013	0.143269	0.138131	0.090617	0.080732	0.148609	0.094722	0.144457	0.0828	0.028	0.104	0.083806	0.083633	0.080578	0.086605	0.091637	0.115351	0.124874
Pop3	0.097706	0.144715	NA	0.144652	0.118544	0.115949	0.078308	0.108201	0.122989	0.075365	0.052784	0.016069	0.077656	0.102023	0.045516	0.072464	0.041918	0.015948	0.066218	0.081021	0.080182	0.073543	0.082696	0.059768
Pop4	0.068724	0.175272	0.144652	NA	0.125364	0.079623	0.089903	0.082992	0.11058	0.108376	0.098519	0.128316	0.064313	0.097997	0.113893	0.105143	0.102444	0.1152	0.08753	0.069455	0.063514	0.076624	0.098428	0.128891
Pop5	0.104744	0.143998	0.118544	0.125364	NA	0.085203	0.123446	0.090119	0.02737	0.094215	0.090297	0.112955	0.095077	0.092569	0.095761	0.080481	0.104192	0.102649	0.136512	0.105058	0.048746	0.101138	0.109316	0.114693
Pop6	0.041328	0.085514	0.115949	0.079623	0.085203	NA	0.069783	0.007491	0.076204	0.096778	0.069713	0.102648	0.058571	0.057011	0.068423	0.047509	0.079996	0.077711	0.080783	0.05819	0.051601	0.064279	0.070128	0.118052
Pop7	0.03614	0.101013	0.078308	0.089903	0.123446	0.069783	NA	0.104593	0.115787	0.064544	0.034631	0.085787	0.014056	0.058664	0.065761	0.055188	0.037953	0.063019	0	0.004473	0.037754	0.015533	0.032603	0.078569
Pop8	0.077482	0.143269	0.108201	0.082992	0.090119	0.007491	0.104593	NA	0.082739	0.140429	0.093358	0.09957	0.097489	0.083676	0.097664	0.083209	0.102069	0.100276	0.109675	0.094677	0.073345	0.09389	0.085278	0.151055
Pop9	0.111497	0.138131	0.122989	0.11058	0.02737	0.076204	0.115787	0.082739	NA	0.102806	0.095461	0.109169	0.094298	0.105016	0.097269	0.080481	0.112111	0.102041	0.121362	0.083521	0.052048	0.102499	0.101861	0.103421
Pop10	0.054349	0.090617	0.075365	0.108376	0.094215	0.096778	0.064544	0.140429	0.102806	NA	0.075224	0.075774	0.034064	0.05963	0.064621	0.053085	0.08164	0.069505	0.053205	0.041323	0.034142	0.037955	0.088772	0.013972
Pop11	0.033689	0.080732	0.052784	0.098519	0.090297	0.069713	0.034631	0.093358	0.095461	0.075224	NA	0.056121	0.053952	0.087932	0.016261	0.024612	0.005629	0.03176	0.028716	0.03715	0.040321	0.045571	0.021561	0.087413
Pop12	0.099627	0.148609	0.016069	0.128316	0.112955	0.102648	0.085787	0.09957	0.109169	0.075774	0.056121	NA	0.087823	0.110966	0.053907	0.078668	0.067233	0.014881	0.069103	0.081575	0.076908	0.063574	0.088899	0.060145
Pop13	0.027895	0.094722	0.077656	0.064313	0.095077	0.058571	0.014056	0.097489	0.094298	0.034064	0.053952	0.087823	NA	0.015328	0.058646	0.039032	0.054558	0.064787	0.013943	0.013292	0.005639	0	0.054341	0.058627
Pop14	0.050385	0.144457	0.102023	0.097997	0.092569	0.057011	0.058664	0.083676	0.105016	0.05963	0.087932	0.110966	0.015328	NA	0.083198	0.070876	0.06817	0.092873	0.076191	0.054502	0.026231	0.021093	0.058537	0.086942
Pop15	0.048417	0.0828	0.045516	0.113893	0.095761	0.068423	0.065761	0.097664	0.097269	0.064621	0.016261	0.053907	0.058646	0.083198	NA	0.016885	0.027716	0.023807	0.063197	0.056887	0.055779	0.054487	0.030587	0.081443
Pop16	0.031262	0.028	0.072464	0.105143	0.080481	0.047509	0.055188	0.083209	0.080481	0.053085	0.024612	0.078668	0.039032	0.070876	0.016885	NA	0.0396	0.039383	0.044217	0.033659	0.035767	0.04562	0.04871	0.086526
Pop17	0.037945	0.104	0.041918	0.102444	0.104192	0.079996	0.037953	0.102069	0.112111	0.08164	0.005629	0.067233	0.054558	0.06817	0.027716	0.0396	NA	0.031529	0.033654	0.043611	0.048383	0.045554	0.027884	0.085502
Pop18	0.069235	0.083806	0.015948	0.1152	0.102649	0.077711	0.063019	0.100276	0.102041	0.069505	0.03176	0.014881	0.064787	0.092873	0.023807	0.039383	0.031529	NA	0.063019	0.057581	0.058054	0.053187	0.061063	0.069505
Pop19	0.018898	0.083633	0.066218	0.08753	0.136512	0.080783	0	0.109675	0.121362	0.053205	0.028716	0.069103	0.013943	0.076191	0.063197	0.044217	0.033654	0.063019	NA	0	0.019492	0.013591	0.043974	0.064439
Pop20	0.02684	0.080578	0.081021	0.069455	0.105058	0.05819	0.004473	0.094677	0.083521	0.041323	0.03715	0.081575	0.013292	0.054502	0.056887	0.033659	0.043611	0.057581	0	NA	0.025414	0.021214	0.109316	0.069605
Pop21	0.027481	0.086605	0.080182	0.063514	0.048746	0.051601	0.037754	0.073345	0.052048	0.034142	0.040321	0.076908	0.005639	0.026231	0.055779	0.035767	0.048383	0.058054	0.019492	0.025414	NA	0.011779	0.052811	0.046578
Pop22	0.034742	0.091637	0.073543	0.076624	0.101138	0.064279	0.015533	0.09389	0.102499	0.037955	0.045571	0.063574	0	0.021093	0.054487	0.04562	0.045554	0.053187	0.013591	0.021214	0.011779	NA	0.04839	0.059842
Pop23	0.047019	0.115351	0.082696	0.098428	0.109316	0.070128	0.032603	0.085278	0.101861	0.088772	0.021561	0.088899	0.054341	0.058537	0.030587	0.04871	0.027884	0.061063	0.043974	0.109316	0.052811	0.04839	NA	0.097552
Pop24	0.084077	0.124874	0.059768	0.128891	0.114693	0.118052	0.078569	0.151055	0.103421	0.013972	0.087413	0.060145	0.058627	0.086942	0.081443	0.086526	0.085502	0.069505	0.064439	0.069605	0.046578	0.059842	0.097552	NA
Average			0.0814885	0.101554	0.100106	0.0722821	0.0594569	0.0957629	0.0977679	0.070017	0.0548438	0.0821012	0.0512221	0.0740986	0.0609967	0.0539294	0.0601431	0.0635139	0.0561457	0.0543018	0.046025	0.0511192	0.0684816	0.0839779
