# Supplementary material for: Limited effect of a highway barrier on the genetic structure of a gypsum soil specialist
Source: PeerJ. 2021 Jan 4;9:e10533. doi: 10.7717/peerj.10533 (PMC7789860; doi:10.7717/peerj.10533)
Supplement: Supplemental Information 4 — The upper part of the matrix shows the gene flow that a population emits. The lower part od the matrix shows the gene flow that a population receives. [file peerj-09-10533-s004.xlsx]

## Sheet: Hoja1
Pop	1	2	3	4	5	6	7	8	9	10	11	12	13	14	15	16	17	18	19	20	21	22	23	24
1	0.675	0.0085	0.0084	0.0082	0.0083	0.0081	0.0243	0.0369	0.0083	0.0082	0.0097	0.008	0.0079	0.0079	0.0882	0.0082	0.0083	0.0081	0.008	0.017	0.0081	0.0101	0.0083	0.0079
2	0.0082	0.6788	0.0084	0.0087	0.0086	0.0087	0.0107	0.009	0.0084	0.0086	0.1297	0.0085	0.0085	0.0085	0.0103	0.0087	0.0084	0.0084	0.0083	0.0087	0.0085	0.0085	0.0084	0.0085
3	0.0077	0.0078	0.8073	0.0077	0.0075	0.0076	0.0089	0.0098	0.0081	0.0075	0.0099	0.0079	0.0077	0.0076	0.0136	0.0077	0.0077	0.0079	0.0077	0.0083	0.0077	0.0078	0.0078	0.0109
4	0.0102	0.0106	0.0106	0.6771	0.0104	0.0103	0.0129	0.0539	0.0104	0.0103	0.0106	0.0107	0.0103	0.0106	0.0143	0.0104	0.0101	0.0105	0.0107	0.0434	0.0102	0.0111	0.0103	0.0103
5	0.0071	0.0078	0.0085	0.0078	0.8072	0.0076	0.0079	0.0077	0.01	0.0071	0.0087	0.008	0.0074	0.0078	0.0079	0.0074	0.0075	0.0077	0.0074	0.0073	0.0076	0.0137	0.0076	0.0154
6	0.0085	0.0085	0.0084	0.0085	0.0159	0.676	0.0099	0.115	0.0096	0.0084	0.009	0.0083	0.0083	0.0085	0.0171	0.0084	0.0085	0.0084	0.0085	0.0115	0.0084	0.0097	0.0085	0.0083
7	0.0074	0.0075	0.0074	0.0079	0.0074	0.0077	0.7975	0.0186	0.0074	0.0074	0.0079	0.0075	0.008	0.0079	0.0181	0.0075	0.0075	0.0081	0.0072	0.0114	0.0079	0.01	0.0075	0.0074
8	0.0085	0.0085	0.0099	0.0079	0.0092	0.0087	0.0092	0.7946	0.0086	0.0087	0.0089	0.0082	0.0084	0.0079	0.0109	0.008	0.0088	0.0079	0.0089	0.013	0.0087	0.0098	0.0085	0.0082
9	0.008	0.0078	0.0078	0.0078	0.1366	0.0078	0.0079	0.008	0.6832	0.009	0.0079	0.0077	0.008	0.0077	0.0077	0.0077	0.0079	0.0081	0.0079	0.0086	0.0081	0.0084	0.0078	0.0125
10	0.0081	0.0082	0.0085	0.008	0.0086	0.0081	0.0106	0.011	0.009	0.6801	0.0084	0.008	0.0083	0.0081	0.0085	0.0083	0.0083	0.0082	0.0081	0.0119	0.0084	0.0186	0.0087	0.1183
11	0.0075	0.0075	0.0238	0.0076	0.0076	0.0078	0.0092	0.0088	0.0074	0.0077	0.6791	0.0076	0.0072	0.0076	0.1337	0.0075	0.0075	0.0077	0.0076	0.0078	0.0073	0.0077	0.0092	0.0076
12	0.0096	0.0096	0.1073	0.0092	0.0094	0.0093	0.0098	0.0093	0.0092	0.0094	0.0166	0.6763	0.0095	0.0094	0.0097	0.0094	0.0093	0.0104	0.0096	0.0095	0.0094	0.0096	0.0097	0.0095
13	0.0106	0.0107	0.0106	0.0105	0.0109	0.0106	0.0109	0.011	0.0106	0.0108	0.0107	0.0109	0.6773	0.0105	0.0108	0.0108	0.0104	0.0108	0.0109	0.0128	0.0111	0.0839	0.0109	0.011
14	0.0102	0.0103	0.01	0.0102	0.0103	0.0102	0.0128	0.0164	0.0103	0.0104	0.0101	0.01	0.0101	0.6768	0.0116	0.0102	0.0101	0.0102	0.0102	0.0102	0.0103	0.0889	0.0104	0.01
15	0.0077	0.0075	0.0123	0.0082	0.0077	0.0073	0.0083	0.0116	0.0079	0.0074	0.01	0.0073	0.0068	0.0079	0.8128	0.0083	0.0078	0.0076	0.0069	0.0079	0.0074	0.0077	0.0079	0.0076
16	0.0091	0.0087	0.0086	0.0087	0.0089	0.0089	0.015	0.0094	0.0088	0.009	0.0488	0.0086	0.0087	0.0087	0.0836	0.6757	0.009	0.0086	0.0088	0.0095	0.0087	0.0086	0.0086	0.0088
17	0.008	0.0078	0.0087	0.0079	0.0076	0.0078	0.0121	0.008	0.0077	0.0077	0.011	0.0075	0.0076	0.0077	0.1384	0.0077	0.6747	0.008	0.0077	0.0083	0.0077	0.0123	0.0084	0.0098
18	0.008	0.008	0.0989	0.0079	0.008	0.0079	0.009	0.0084	0.0081	0.0082	0.0092	0.0081	0.0081	0.0079	0.0531	0.008	0.0079	0.6771	0.0082	0.0081	0.0078	0.0082	0.008	0.0081
19	0.0095	0.0095	0.0095	0.0097	0.0097	0.0097	0.0938	0.0162	0.0096	0.0093	0.0104	0.0094	0.0098	0.0097	0.0114	0.0095	0.0094	0.0096	0.6763	0.0184	0.0098	0.0103	0.0096	0.0101
20	0.008	0.0081	0.0079	0.0079	0.0149	0.0083	0.0913	0.0281	0.0081	0.0079	0.0085	0.0076	0.0078	0.008	0.0123	0.008	0.0077	0.0079	0.0082	0.6847	0.0079	0.0243	0.0081	0.0083
21	0.0079	0.008	0.0077	0.0078	0.059	0.0078	0.0142	0.0079	0.0097	0.0078	0.0077	0.0078	0.0077	0.0076	0.0082	0.0078	0.0078	0.0078	0.008	0.01	0.6747	0.0915	0.0077	0.008
22	0.0079	0.008	0.0103	0.0075	0.0079	0.0072	0.0125	0.0134	0.008	0.0079	0.0078	0.0081	0.0075	0.0073	0.0098	0.008	0.0076	0.0074	0.0077	0.0096	0.0073	0.8033	0.0075	0.0105
23	0.0079	0.0076	0.0075	0.0077	0.0078	0.0079	0.0173	0.0084	0.0075	0.0077	0.0098	0.0076	0.0079	0.0078	0.1351	0.0079	0.0076	0.0078	0.0077	0.0078	0.0079	0.0076	0.683	0.0074
24	0.0085	0.0079	0.0102	0.0081	0.0081	0.0087	0.0105	0.0096	0.0086	0.0091	0.0088	0.008	0.0083	0.0078	0.0096	0.0082	0.0079	0.0083	0.0084	0.0088	0.0081	0.0105	0.0083	0.7994
