# Supplementary material for: Limited effect of a highway barrier on the genetic structure of a gypsum soil specialist
Source: PeerJ. 2021 Jan 4;9:e10533. doi: 10.7717/peerj.10533 (PMC7789860; doi:10.7717/peerj.10533)
Supplement: Supplemental Information 5 — The upper part of the matrix shows the gene flow that a population emits. The lower part od the matrix shows the gene flow that a population receives. [file peerj-09-10533-s005.xlsx]

## Sheet: Hoja1
Populations	1	2	3	4	5	6	7	8	9	10	11	12	13	14	15	16	17	18	19	20	21	22	23	24
1		12.76	2.98	14.59	18.48	35.89	9.28	11.77	3.56	9.2	18.73	25.45	12.35	21.22	23.12	16.57	9.11	16.41	15.58	24.04	10.61	14.5	30.75	6.54
2	5.57		6.08	8.28	6.57	1.28	3.13	9.4	5.69	5.07	2.98	4.25	5.1	14.85	4.91	6.84	5.84	4.6	1.39	5.8	6.38	7.54	16.56	4.56
3	3.04	1.1		2.21	9.78	2.12	13.74	11.9	2.49	17.52	0.37	11.53	1.1	27.49	35.97	17.25	28.32	58.12	11.9	17.07	4.06	12.73	2.49	8.3
4	5.7	5.16	5.15		11.89	13.16	13.71	13.35	6.37	12.19	4.79	18.69	9.34	21.29	12.92	19.41	7.16	12.19	13.77	17.9	6.61	9.89	16.6	5.88
5	6.6466	6.3533	2.0526	8.748		11.9247	9.8721	4.936	34.01	8.748	5.0827	1.5639	21.0637	20.0374	4.3007	7.0864	6.4511	5.5225	6.8909	10.1653	20.2818	21.9434	12.4623	7.624
6	35.32	6.62	10.55	14.39	20.23		22.5	40.43	4.7	28.89	23.28	14.73	26.16	9.41	30.52	36.69	30.61	14.82	8.02	19.18	22.41	10.98	24.24	13.34
7	3.85	10.3	3.4	12.3	9.11	24.6		8.75	14.95	4.85	8.2	17.3	7.45	15.6	11.9	14.1	8.05	11.45	4.25	20.75	9.05	7.01	20.05	18.5
8	12.19	15.79	4.98	13.72	25.57	18.02	16.35		12.68	12.05	12.88	2.42	17.67	14.82	8.17	3.32	6.86	3.88	22.52	16.7	26.4	23.42	7.89	5.4
9	11.2533	4.3282	0.371	10.82	28.44	5.503	13.91	5.0702		5.1938	6.6778	5.3793	7.29	20.09	4.6992	5.0702	5.9358	6.245	5.5	14.53	13.66	21.82	8.09	7.41
10	9.22	9.38	10.07	8.47	12.77	14.41	4.61	3.81	3.02		8.1	9.38	6.83	11.6	16.95	10.01	8.37	13.56	10.91	10.17	15.15	6.3	4.98	14.57
11	7.02	14.37	36.77	8.42	14.87	11.4	22.72	19.83	8.84	1.65		21.23	9.99	5.45	46.02	24.78	37.1	35.28	14.05	9.83	9.91	8.59	9.83	4.71
12	4.45	1.01	5.63	12.14	0.12	5.25	7.65	1.51	7.08	6.26	33.34		6.01	1.39	14.8	4.36	15.18	11.64	30.36	25.62	3.35	7.02	8.22	29.16
13	8.09	10.66	3.38	21.95	25.51	35.64	16.71	18.84	10.84	12.62	19.46	7.11		25.34	22.22	11.38	6.93	1.6	17.15	26.49	16.88	20.89	15.11	8.35
14	18.88	6.86	3.04	16.33	16.9	13.08	28.92	11.24	6.43	23.12	15.91	11.66	24.68		16.47	21.42	9.19	8.62	10.32	16.83	18.03	27.22	14.92	34.3
15	24.51	6.93	15.96	12.15	11.56	11.5	25.64	15.75	9.25	20.75	24.3	13.49	2.95	11.61		2.58	12.63	10.86	15.32	14.94	8.49	10.21	16.93	14.35
16	30.27	26.62	10.69	46.19	22.01	87.28	45.1	35.37	6.44	8.99	26.86	1.33	32.58	13.98	45.46		33.3	17.26	18.84	46.19	21.39	28.32	15.92	13.61
17	15.64	55.01	14.28	20.31	26.6	12.58	32.38	12.07	12.75	4.76	18.19	4.09	6.03	5.1	17.93	64.18		15.05	17.1	6.46	6.46	8.84	17.77	3.65
18	2.82	2.03	34.11	4.85	14.48	6.01	9.26	6.44	14.91	24.69	16.14	42.01	6.59	11.8	6.81	34.11	12.38		17.66	15.56	9.26	11.22	7.24	19.84
19	34.77	8.99	11.71	11.8	10.62	15.8	7.36	13.89	18.08	7.17	17.71	10.26	18.71	18.25	28.33	22.7	21.7	18.97		30.96	17.44	10.07	20.88	7.53
20	11.89	10.97	15.98	13.42	19.22	16.83	24.86	18.83	7.9	13.71	19.45	3.29	16.72	20.71	23.66	16.95	12.97	17.4	25.95		10.92	15.7	22.01	7.28
21	5.281	3.1084	1.1698	5.4816	7.721	9.9938	7.3199	10.4952	7.253	13.0689	7.0525	2.9079	4.9134	8.3895	7.3199	6.2837	3.9441	3.3424	5.1139	9.8936		8.6234	5.1139	9.3588
22	21.99	11.38	8.85	12.22	15.94	27.47	5.83	12.36	11.52	4.63	12.57	7.79	15.31	22.48	22.62	15.81	13.91	17.07	5.69	22.48	19.11		14.26	14.4
23	19.5	18.94	6.81	22.13	11.95	14.34	17.59	9.25	3.25	4.84	9.56	21.21	17.41	4.53	10.91	11.46	28.82	14.28	2.82	23.85	10.42	4.29		9.87
24	5.37	12.82	9.45	3.6	7.68	5.19	10.69	10.93	4.66	15.18	12.41	2.48	3.78	22.21	10.33	5.25	5.91	8.68	7.44	39.76	19.91	12.82	7.5
